# Supplementary material
Source: PubMed Central journal article supplement (PMC7494207)
Supplement: NIHMS1608127-supplement-Supplemental_Information.pdf [file NIHMS1608127-supplement-Supplemental_Information.pdf]

## Supporting Information

# Understanding Time-Dependent Surface-Enhanced Raman Scattering from Gold Nanosphere Aggregates using Collision Theory

*Hoa T. Phan, Thomas S. Heiderscheit, and Amanda J. Haes\**

Department of Chemistry, University of Iowa, Iowa City, Iowa 52242, United States

\*Email: [amanda-haes@uiowa.edu](mailto:amanda-haes@uiowa.edu); Tel: 319-384-3695

### **Table of Contents**

|                                                                             |    |
|-----------------------------------------------------------------------------|----|
| Vibrational Mode Assignments for 2-NT                                       | S2 |
| Modeling Diffusion and Sedimentation Velocities for Au Nanosphere Clusters  | S2 |
| Evaluating Cluster Size as a Function of Nanosphere Concentration using DLS | S2 |
| Time-Dependent LSPR, SERS, and DLS as a Function of Nanosphere Diameter     | S3 |
| References                                                                  | S4 |

**Vibrational Mode Assignments for 2-NT.** Vibrational mode assignments and frequencies associated with 2-NT are labeled in Figure 3B and summarized in Table S1. The band with the largest intensity occurs at  $1067\text{ cm}^{-1}$  and represents a combination band associated with ring breathing, in-plane C-H bending, and ring stretching. This band is representative of signal changes for all observed frequencies and used for evaluating time-dependent changes in SERS spectra.

**Table S1.** Vibrational mode Assignments for 2-NT

| Vibrational Frequency ( $\text{cm}^{-1}$ ) | Vibration Mode                                          | Ref. |
|--------------------------------------------|---------------------------------------------------------|------|
| 1449                                       | In-plane C-H bending + Ring CC stretching               | 1,2  |
| 1429                                       | In-plane C-H bending + C-S stretching                   | 1,2  |
| 1379                                       | Ring CC stretching                                      | 12   |
| 1144                                       | In-plane C-H bending                                    | 1,2  |
| 1130                                       | In-plane C-H bending                                    | 1,2  |
| 1067                                       | Ring breathing + In-plane C-H bending + Ring stretching | 1,2  |
| 1022                                       | In-plane C-H bending                                    | 2    |

**Modeling Diffusion and Sedimentation Velocities for Au Nanosphere Clusters.** Diffusion and sedimentation velocities of clusters are calculated using equations 14 and 15, respectively. These are plotted as a function of cluster size in Figure S1. The net displacement ( $x$ ) was determined by calculating the average distance between two adjacent nanoparticles in a 5 nM assuming hexagonal packing. A critical cluster size is noted as 325 nm. Clusters with dimensions greater than this value have a probability to sediment out of solution whereas clusters smaller than this value likely do not.

**Evaluating Cluster Size as a Function of Nanosphere Concentration using DLS.**

Time-dependent hydrodynamic diameters of clusters are measured using DLS. In this study, gold nanospheres with a diameter of 13.6 nm and concentrations ranging from 0.5 – 5 nM are incubated with an excess of 2-NT. These data are shown in Figure S2. The self-limiting cluster model (eq. 13) is used to extract rate constants associated with cluster formation. Data in the diffusion-limited regime are analyzed. As nanosphere concentration increases from 0.5 to 5 nM, the rate constant

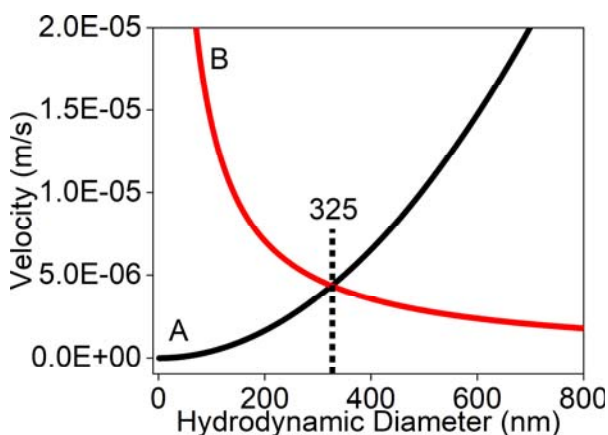

**Figure S1.** Calculated (A) sedimentation and (B) diffusion velocities for 13.6 nm gold nanospheres. A 5 nM nanosphere concentration suspended in a 5 mM ionic strength aqueous solution at room temperature was used. This result indicates that clusters with hydrodynamic diameters greater than  $\sim 325$  nm will undergo sedimentation.

associated with cluster formation increases. The number of nanospheres per cluster is calculated using the hydrodynamic diameter of primary nanospheres.

### Time-Dependent LSPR, SERS, and DLS as a Function of Nanosphere Diameter.

Three-dimensional waterfall plots representing time-dependent LSPR and SERS spectra of 0.5 nM gold nanospheres with diameters ranging from 13.6 - 47.3 nm after the addition of an excess of 2-NT are shown in Figure S3, S4, and S5. DLS data are shown in Figure S6. SERS and LSPR data are plotted with different scale bars so that time dependent trends can be displayed. These data are summarized in terms of flocculation area (from 670-770 nm) and SERS intensity (at 1067  $\text{cm}^{-1}$ ) in two and three dimensions in Figure S7 and Figure 5, respectively.

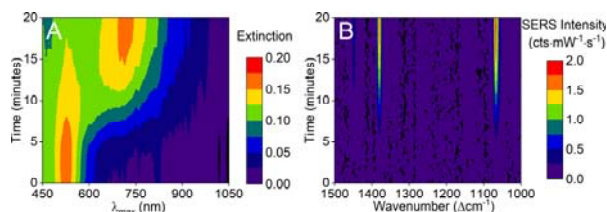

**Figure S3.** Waterfall maps of time-dependent (A) LSPR and (B) SERS spectra from 0.5 nM gold nanospheres ( $d=13.6$  nm) before and after addition of  $2.7 \mu\text{M}$  2-NT. Same data collection parameters used in Figure 3 unless noted.

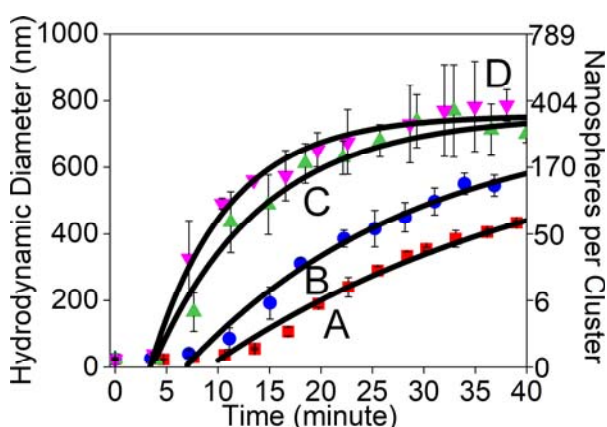

**Figure S2.** Time-dependent hydrodynamic diameters (left) and (nanospheres per cluster) for clusters resulting from 2-NT addition to (A) 0.5, (B) 1, (C) 3, and (D) 5 nM gold nanospheres ( $d = 13.6$  nm). Solid black lines are fits using the self-limiting cluster model.

These data are summarized in terms of flocculation area (from 670-770 nm) and SERS intensity (at 1067  $\text{cm}^{-1}$ ) in two and three dimensions in Figure S7 and Figure 5, respectively.

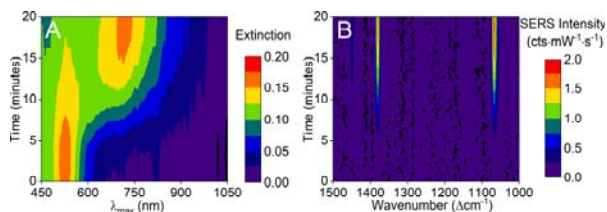

**Figure S4.** Waterfall maps of time-dependent (A) LSPR and (B) SERS spectra of 0.5 nM gold nanospheres ( $d=27.7$  nm) before and after addition of  $11.1 \mu\text{M}$  2-NT. Same data collection parameters used in Figure 3 unless noted.

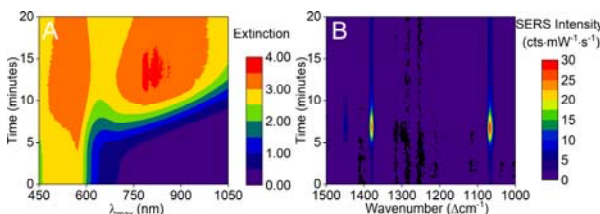

**Figure S5.** Waterfall maps of time-dependent (A) LSPR and (B) SERS spectra from 0.5 nM gold nanospheres ( $d=47.3$  nm) before and after addition of  $32.5 \mu\text{M}$  2-NT. Same data collection parameters used in Figure 3 unless noted.

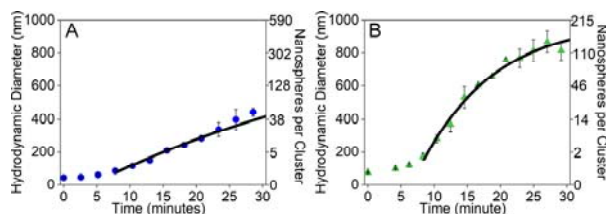

**Figure S6.** Hydrodynamic diameter of nanoparticles in 0.5 nM gold nanosphere solution with diameters of (A) 27.7 and (B) 47.3 nm. Solid black lines are analyses using the self-limiting cluster model (eq. 13). The number of nanoparticles per cluster is calculated using a packing density of 4.5% and hydrodynamic diameters of primary nanospheres of 42.4 and 59.4 nm for A and B, respectively.

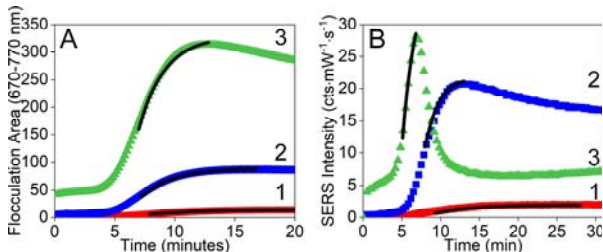

**Figure S7.** Time-dependent (A) flocculation area calculated from 670-770 nm in LSPR spectra and (B) SERS intensity at  $1067\text{ cm}^{-1}$  upon adding an excess of 2-NT to 0.5 nM gold nanoparticles with diameters of (1) 13.6, (2) 27.7, and (3) 47.3 nm. Fitted lines represent the self-limited cluster model in the diffusion-limited regime.

## REFERENCES

1. Agarwal, N. R.; Lucotti, A.; Tommasini, M.; Neri, F.; Trusso, S.; Ossi, P. M. SERS detection and DFT calculation of 2-naphthalene thiol adsorbed on Ag and Au probes. *Sensors Actuators B: Chem.* **2016**, *237*, 545-555.
2. Alvarez-Puebla, R. A.; Dos Santos, D. S., Jr.; Aroca, R. F. Surface-enhanced Raman scattering for ultrasensitive chemical analysis of 1 and 2-naphthalenethiols. *Analyst* **2004**, *129*, 1251-1256.
